# Supplementary material for: Tartrate-resistant acid phosphatase 5 regulates the metabolic flexibility of macrophages in the tumor microenvironment, thereby influencing their functional fate and modulating tumor growth
Source: Research Square preprint supplement (doi:10.21203/rs.3.rs-6656922/v1), 2025-08-05
Supplement: Supplementary file 1 [file 46fb1989af231802c9a6156e.xlsx]

## Sheet: Human Primers
	Genes	Primers
		5'-3'
	hPDL-1 QF	GTGGCATCCAAGATACAAACTCAA
	hPDL-1 QR	TCCTTCCTCTTGTCACGCTCA
	hCD47 QF	GGCAATGACGAAGGAGGTTA
	hCD47 QR	ATCCGGTGGTATGGATGAGA
	hCD86 QF	GTA TTT TGG CAG GAC CAG GA
	hCD86 QR	GCC GCT TCT TCT TCT TCC AT
	hCD80 QF	CCT CTC CAT TGT GAT CCT GG
	hCD80 QR	GGC GTA CAC TTT CCC TTC TC
	hGalectin QF	CTTTCATCACCACCATTCTG
	hGalectin QR	ATGTGGAACCTCTGAGCACTG
	hSIRP-a QF	GTTTAAGTCTGGAGCAGGCACT
	hSIRP-a QR	GCAGATGACTTGAGAGTGAACG
	hCTLA-4 QF	CTACCTGGGCATAGGC AACG
	hCTLA-4 QR	CCCCGAACTAACTGCTGCAA
	hTim-3 QF	TCCAAGGATGCTTACCACCAG
	hTim-3 QR	AACACAAATATCCACATTGGC

## Sheet: Mouse Primers
	Genes	Primers
		5'-3'
	mPDL-1 QF	CGCCTGCAGATAGTTCCCAA
	mPDL-1 QR	AGGGTTCAACACTGCTTACG
	mCD47 QF	CACAGTCATCGTGGTTGTTGGA
	mCD47 QR	GTGATCAATATGGCAATGGTGAAAG
	mCD86 QF	CATGGGCTTGGCAATCCTTA
	mCD86 QR	AAATGGGCACGGCAGATATG
	mCD80 QF	CTGGGAAAAACCCCCAGAAG
	mCD80 QR	TGACAACGATGACGACGACTG
	mGalectin-9 QF	CTTTCTACACCCCCATTCCA
	mGalectin-9 QR	CTCGTAGCATCTGGCAAG
	mSIRP-a QF	TCATCTGCGAGGTAGCCCACAT
	mSIRP-a QR	ACTGTTGGGTGACCTTCACGGT
	mCTLA-4 QF	GTACCTCTGCAAGGTGGAACTC
	mCTLA-4 QR	CCAAAGGAGGAAGTCAGAATCCG
	mTim-3 QF	CAACTCGAGATGTTTTCAGGTCTTACCCT
	mTim-3 QR	AACGGATCCTCAGGATGGCTGCTGGCTGT
	mPD-1 QF	CGGTTTCAAGGCATGGTCATTGG
	mPD-1 QR	TCAGAGTGTCGTCCTTGCTTCC
